# Supplementary material for: Paxillin kinase linker (PKL) regulates Vav2 signaling during cell spreading and migration
Source: PubMed Central journal article supplement — Mol Biol Cell. 2013 Jun 15;24(12):1882–94. doi: 10.1091/mbc.E12-09-0654 (PMC3681694; doi:10.1091/mbc.e12-09-0654), 2013-06-15

## Supplementary Information

### Figure Legends

**Figure S1.** EGF and constitutively active Vav2 (CA-Vav2) enhance  $\beta$ -PIX localization to adhesions. (A) HT1080 cells were spread on FN in the absence or presence of EGF for 30 minutes then stained for paxillin and  $\beta$ -PIX. Scale bar 10 $\mu$ m. (B) HT1080 cells transfected with GFP or GFP plus HA-CA-Vav2 were spread on FN in the absence of EGF for 30 minutes then stained for paxillin and  $\beta$ -PIX. Scale bar 10 $\mu$ m. The average focal adhesion size (C), the average ratio of  $\beta$ -PIX intensity to paxillin intensity per adhesion (D) was quantified using Image J. Values represent the mean  $\pm$  S.E.M for 3 experiments and at least 8 cells per experiment. \*P<0.05, \*\*P<0.005

**Figure S2.** Vav2 exchange activity is required for EGF-stimulated localization of  $\beta$ -PIX to adhesions. (A) HT1080 cells transfected with GFP or GFP together with dominant negative RS-Vav2 were spread on FN for 30 minutes in the presence of EGF, then stained for  $\beta$ -PIX and paxillin. Scale bars 10 $\mu$ m. Line profiles through adhesions indicated in (A) demonstrate decreased intensity of  $\beta$ -PIX in paxillin-positive adhesions. The average focal adhesion size (C), the average ratio of  $\beta$ -PIX intensity to paxillin intensity per adhesion (D) was quantified using Image J. Values are means  $\pm$  S.E.M for 3 experiments and at least 6 cells per experiment. \*P<0.04

**A** FN 30min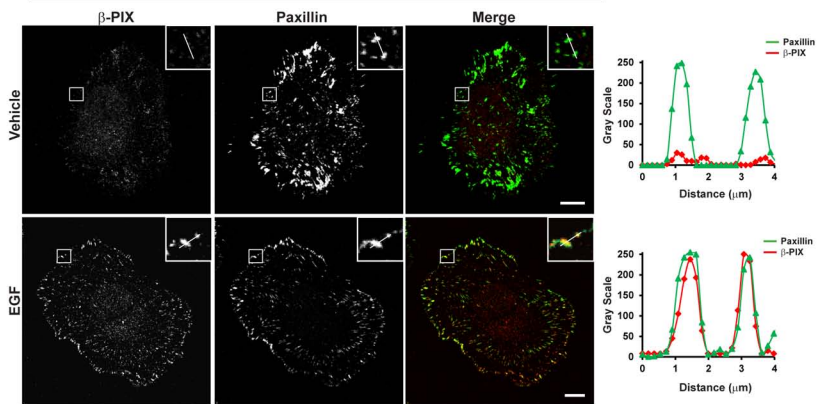**B**  $\beta$ -PIX Paxillin Merge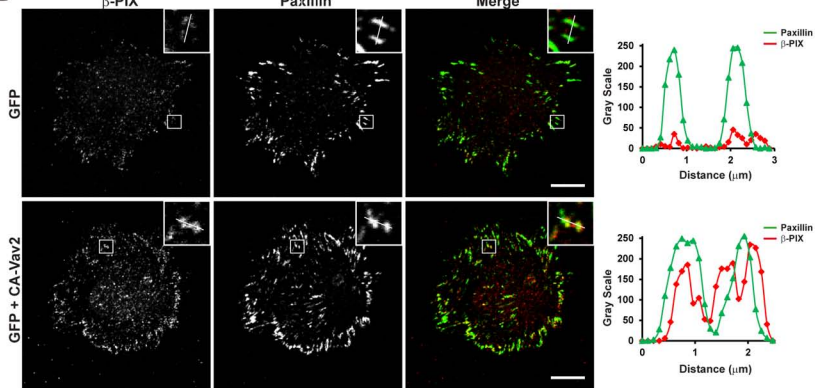**C**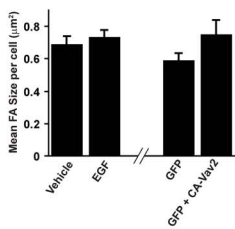**D**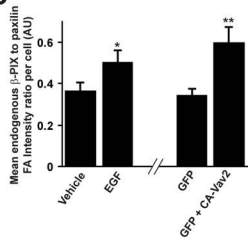

**A**

FN + EGF 30min

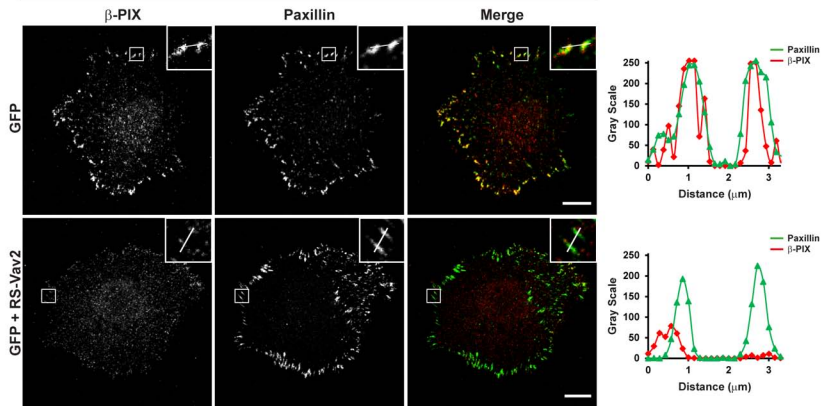**B**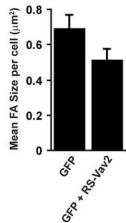**C**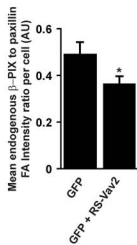

Supplement: supp_E12-09-0654v1_CombinedSupMats.pdf [file supp_E12-09-0654v1_CombinedSupMats.pdf]
